# Supplementary material
Source: HighWire-hosted journal article supplement (https://jnis.bmj.com/content/17/3/236)
Supplement: inline-supplementary-material-1 [file inline-supplementary-material-1.pdf]

Figure S1. Study Flowchart

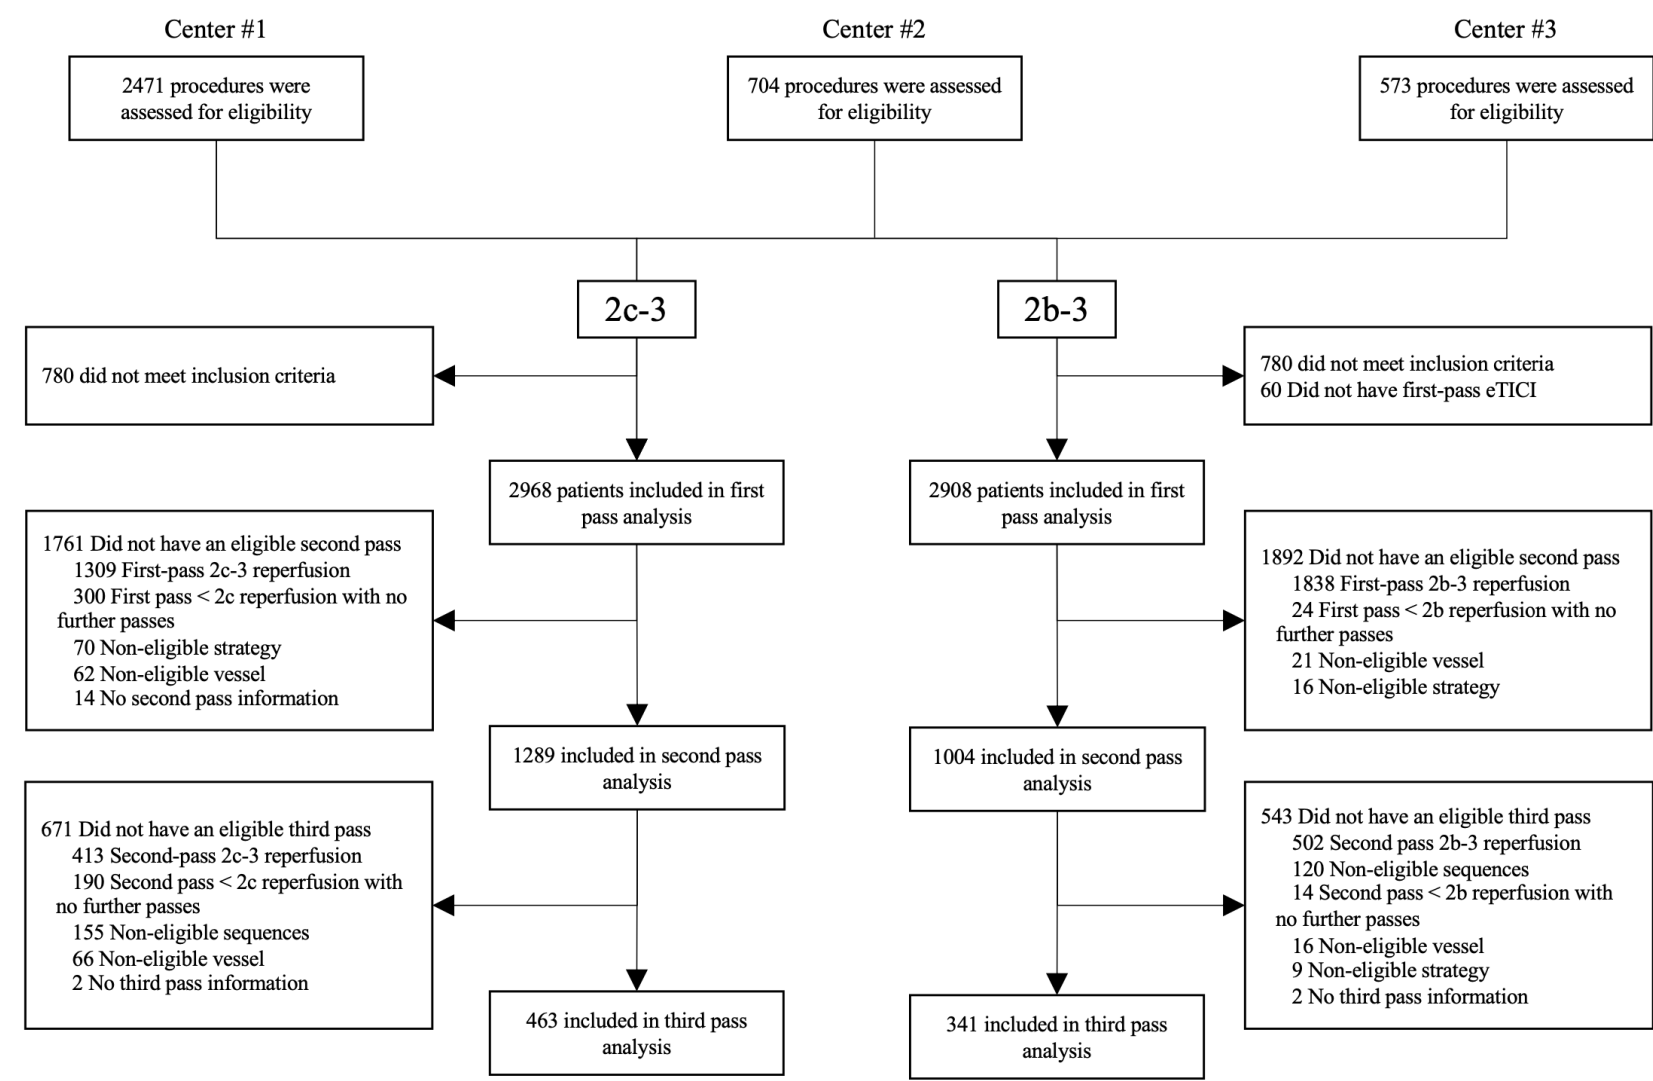

**Figure S2.** Flowchart for cumulative full reperfusion incidence estimates (using stent-retriever as an example for first line approach).

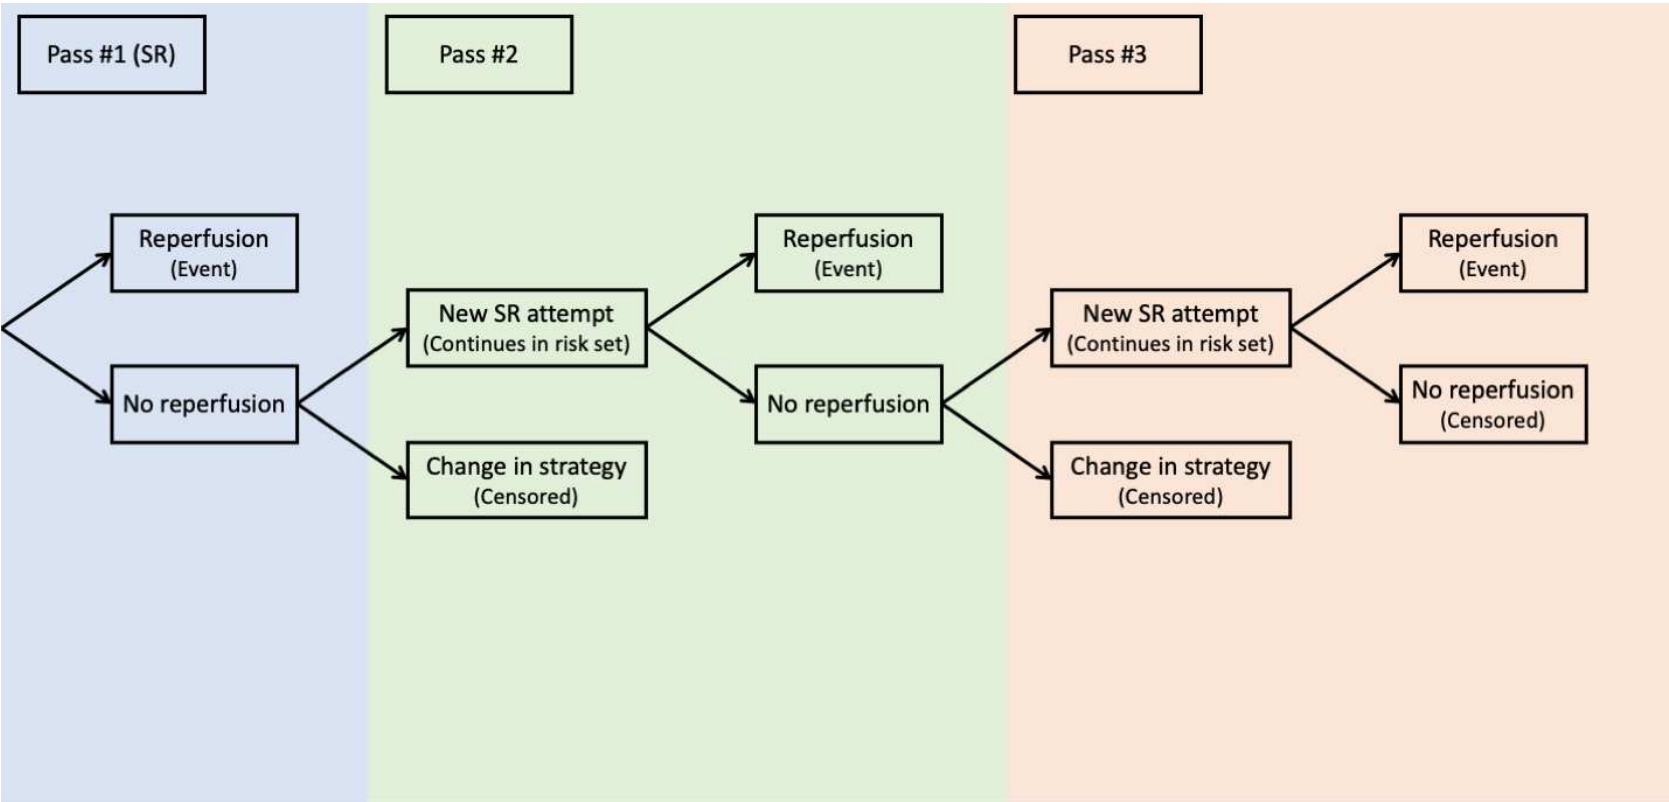

Legend: When estimating the cumulative incidence of reperfusion for sequences of techniques, i.e., SR/SR/SR, all participants with the first stent-retriever pass were considered regardless of strategies in further passes. If reperfusion was achieved, an event was considered. If reperfusion was not achieved leading to a subsequent change in strategy or no other attempt, the participant was censored. If reperfusion was not achieved but a new attempt with the same strategy was performed, the participant remained in the group at risk. The same principle applies to CA and CT, as well as when techniques changed during the procedural course. Because an individual can participate in more than one sequence (e.g., an individual with SR/SR/SR would be considered in SR/SR/SR and SR/SR/CA analysis for cumulative incidences of reperfusion), which would artificially narrow the standard errors for comparisons, the cumulative reperfusion rates over time were not directly compared across groups that begun with the same strategy. SR: Stent-retriever.

Figure S3. Cumulative incidences of eTICI 2b-3 according to reperfusion strategies

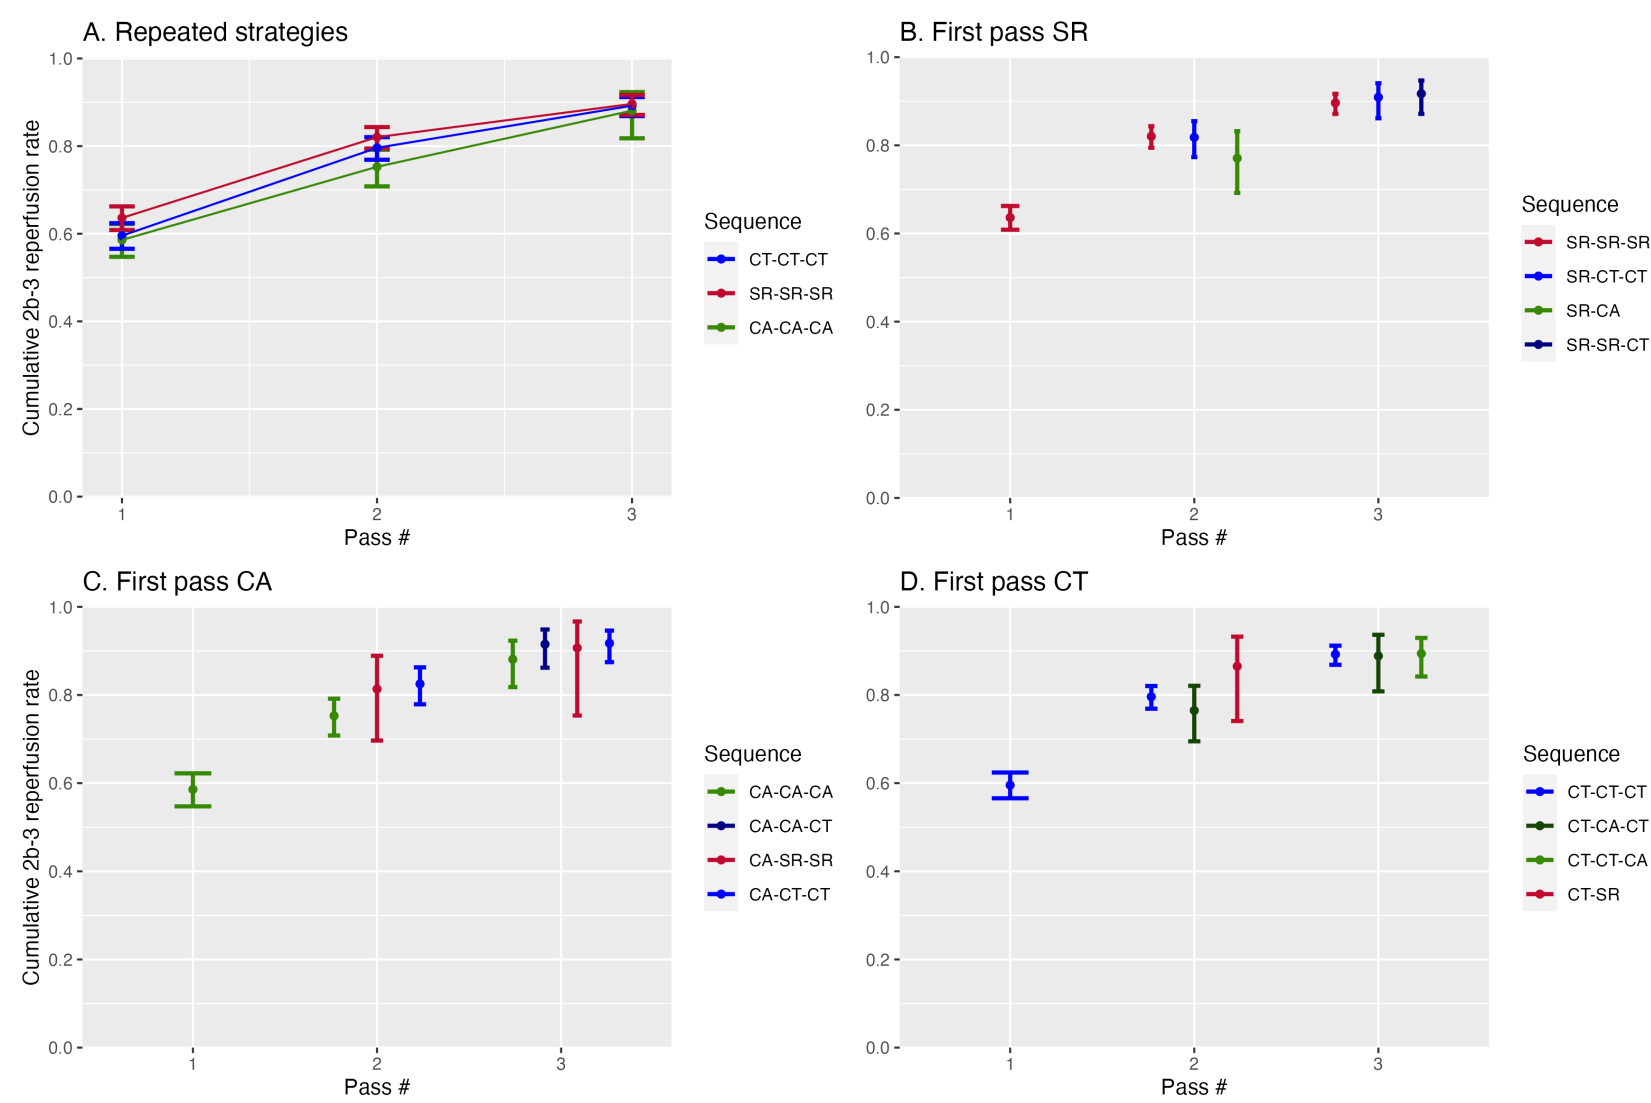

Cumulative incidences of 2b-3 reperfusion and 95% CIs: SR 89.6% (87.1% - 91.7%); CA 88.1% (81.8% - 92.3%); CT 89.2% (86.9% - 91.2%)

aHR (95%CI): 1.1 (1.0 – 1.3), p = 0.087 for SR vs. CA; 1.1 (1.0 – 1.2), p = 0.239 for CT vs. SR; 1.2 (1.0 - 1.4), p = 0.009 for CT vs. CA.

aHR: adjusted hazard ratio; SR: Stent-retriever; CA: Contact Aspiration; CT: Combined technique.

Figure S4. First-line strategies over time

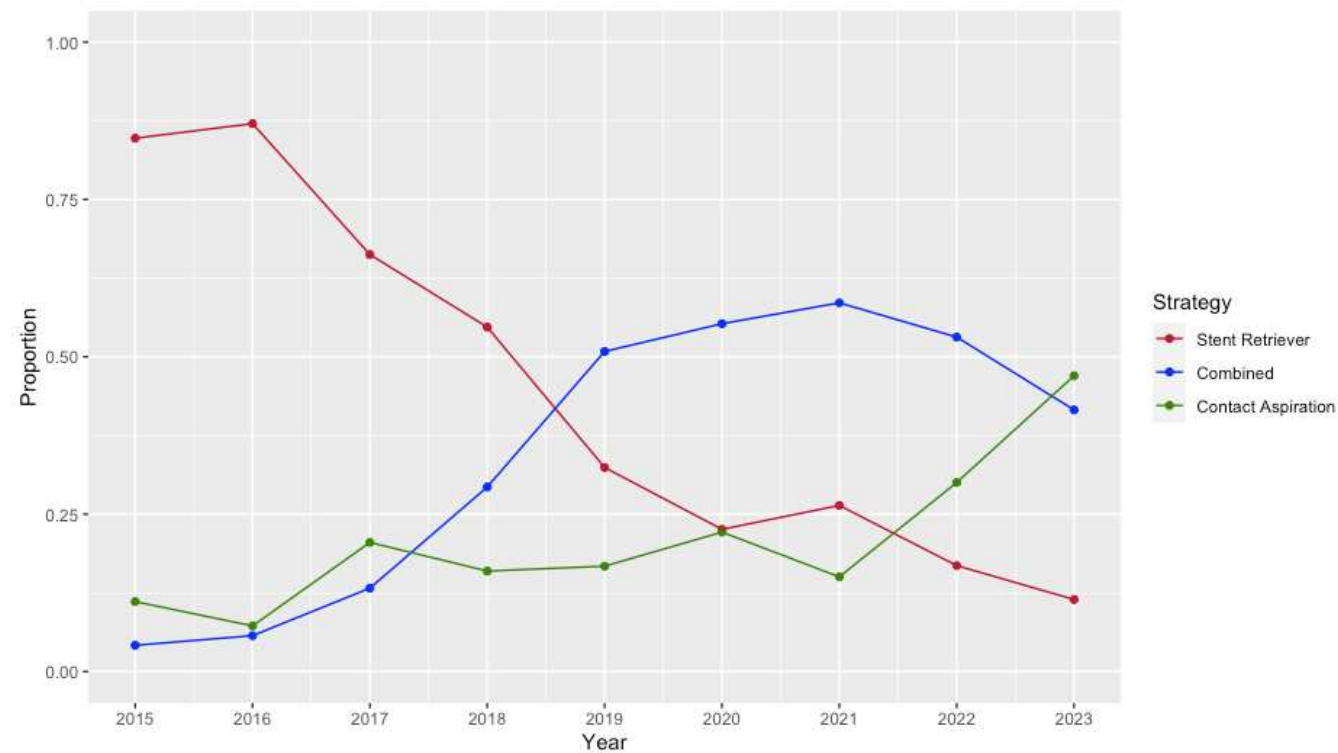

Table S1. Descriptive analysis

| Characteristic             | First attempt strategy          |                                         |                                          |                                  |
|----------------------------|---------------------------------|-----------------------------------------|------------------------------------------|----------------------------------|
|                            | Overall, N = 2,968 <sup>1</sup> | Stent Retriever, N = 1,220 <sup>1</sup> | Contact Aspiration, N = 664 <sup>1</sup> | Combined, N = 1,084 <sup>1</sup> |
| Age                        | 66 [56 - 77]                    | 65 [55 - 76]                            | 64 [53 - 74]                             | 70 [59 - 80]                     |
| Male                       | 1,535 (52%)                     | 623 (51%)                               | 380 (57%)                                | 532 (49%)                        |
| Occlusion location         |                                 |                                         |                                          |                                  |
| M1                         | 1,638 (55%)                     | 665 (55%)                               | 357 (54%)                                | 616 (57%)                        |
| M2                         | 617 (21%)                       | 292 (24%)                               | 97 (15%)                                 | 228 (21%)                        |
| ICA T                      | 403 (14%)                       | 176 (14%)                               | 76 (11%)                                 | 151 (14%)                        |
| Basilar                    | 231 (7.8%)                      | 51 (4.2%)                               | 114 (17%)                                | 66 (6.1%)                        |
| ICA Petrous or Cavernous   | 79 (2.7%)                       | 36 (3.0%)                               | 20 (3.0%)                                | 23 (2.1%)                        |
| ASPECTS                    | 8 [7 - 10]                      | 8 [7 - 10]                              | 8 [7 - 10]                               | 8 [7 - 10]                       |
| NIHSS                      | 16 [11 - 21]                    | 16 [12 - 21]                            | 17 [11 - 22]                             | 16 [11 - 21]                     |
| IV tPA                     | 1,067 (36%)                     | 436 (36%)                               | 240 (37%)                                | 391 (36%)                        |
| LKN-Puncture time (min)    | 383 [224 - 745]                 | 392 [224 - 731]                         | 372 [210 - 752]                          | 390 [231 - 765]                  |
| Procedural time (min)      | 47 [30 - 76]                    | 49 [32 - 75]                            | 39 [25 - 62]                             | 50 [32 - 82]                     |
| Balloon guide catheter use | 1852 (66%)                      | 969 (85%)                               | 268 (46%)                                | 615 (57%)                        |
| General Anesthesia         | 1,115 (38%)                     | 371 (31%)                               | 342 (52%)                                | 402 (37%)                        |
| First pass eTICI           |                                 |                                         |                                          |                                  |
| 0                          | 56 (1.9%)                       | 20 (1.6%)                               | 17 (2.6%)                                | 19 (1.8%)                        |
| 1                          | 14 (0.5%)                       | 5 (0.4%)                                | 3 (0.5%)                                 | 6 (0.6%)                         |
| 2a                         | 61 (2.1%)                       | 25 (2.1%)                               | 16 (2.4%)                                | 20 (1.8%)                        |
| 2b50                       | 167 (5.6%)                      | 74 (6.1%)                               | 45 (6.8%)                                | 48 (4.4%)                        |
| 2b67                       | 626 (21%)                       | 252 (21%)                               | 109 (16%)                                | 265 (24%)                        |
| 2c                         | 371 (13%)                       | 146 (12%)                               | 92 (14%)                                 | 133 (12%)                        |
| 3                          | 1667 (56%)                      | 694 (57%)                               | 380 (57%)                                | 593 (55%)                        |

<sup>1</sup>Median [IQR]; n (%)

Table S2. Demographic characteristics, occlusion sites and reperfusion rates in the second pass according to technique and first pass strategy **for the eTICI2c-3 cohort.**

| First Pass              | Stent Retriever                       |                                         |                               | Contact Aspiration                   |                                          |                                | Combined                             |                                         |                                |
|-------------------------|---------------------------------------|-----------------------------------------|-------------------------------|--------------------------------------|------------------------------------------|--------------------------------|--------------------------------------|-----------------------------------------|--------------------------------|
| Second pass             | Stent Retriever, N = 370 <sup>1</sup> | Contact Aspiration, N = 34 <sup>1</sup> | Combined, N = 92 <sup>1</sup> | Stent Retriever, N = 26 <sup>1</sup> | Contact Aspiration, N = 160 <sup>1</sup> | Combined, N = 126 <sup>1</sup> | Stent Retriever, N = 23 <sup>1</sup> | Contact Aspiration, N = 49 <sup>1</sup> | Combined, N = 409 <sup>1</sup> |
| Age                     | 66 (56 – 77)                          | 70 (60 – 79)                            | 66 (57 – 80)                  | 64 (57 – 68)                         | 61 (48 – 72)                             | 63 (54 – 72)                   | 65 (52 – 74)                         | 64 (57 – 74)                            | 70 (60 – 79)                   |
| Male                    | 189 (51%)                             | 17 (50%)                                | 45 (49%)                      | 18 (69%)                             | 90 (56%)                                 | 79 (63%)                       | 15 (65%)                             | 24 (49%)                                | 201 (50%)                      |
| Occlusion location      |                                       |                                         |                               |                                      |                                          |                                |                                      |                                         |                                |
| MCA M1                  | 189 (51%)                             | 12 (35%)                                | 44 (48%)                      | 13 (50%)                             | 74 (46%)                                 | 58 (46%)                       | 11 (48%)                             | 21 (43%)                                | 188 (46%)                      |
| MCA M2                  | 110 (30%)                             | 14 (41%)                                | 32 (35%)                      | 6 (23%)                              | 38 (24%)                                 | 34 (27%)                       | 9 (39%)                              | 22 (45%)                                | 145 (36%)                      |
| Intracranial ICA        | 51 (14%)                              | 7 (21%)                                 | 15 (16%)                      | 4 (15%)                              | 32 (20%)                                 | 18 (14%)                       | 2 (8.7%)                             | 4 (8.2%)                                | 57 (14%)                       |
| Basilar                 | 17 (4.6%)                             | 1 (2.9%)                                | 0 (0%)                        | 3 (12%)                              | 16 (10%)                                 | 15 (12%)                       | 1 (4.3%)                             | 2 (4.1%)                                | 18 (4.4%)                      |
| ASPECTS                 | 8 (7 – 10)                            | 8 (7 – 10)                              | 8 (7 – 10)                    | 9 (7 – 10)                           | 8 (7 – 9)                                | 8 (7 – 9)                      | 8 (6 – 9)                            | 8 (7 – 9)                               | 8 (7 – 9)                      |
| NIHSS                   | 17 (12 – 21)                          | 18 (14 – 23)                            | 16 (12 – 23)                  | 19 (16 – 23)                         | 18 (12 – 22)                             | 17 (11 – 22)                   | 16 (14 – 22)                         | 17 (14 – 21)                            | 17 (11 – 21)                   |
| LKW-Puncture time (min) | 397 (227 – 766)                       | 310 (190 – 959)                         | 425 (223 – 777)               | 422 (285 – 551)                      | 349 (203 – 696)                          | 479 (227 – 861)                | 560 (203 – 1101)                     | 356 (189 – 650)                         | 377 (230 – 743)                |
| Procedural time (min)   | 71 (52 – 107)                         | 70 (47 – 116)                           | 66 (52 – 99)                  | 47 (35 – 84)                         | 55 (40 – 74)                             | 56 (40 – 81)                   | 73 (54 – 110)                        | 87 (72 – 111)                           | 68 (49 – 104)                  |
| Balloon guide catheter  | 265 (78%)                             | 29 (91%)                                | 83 (90%)                      | 10 (56%)                             | 61 (46%)                                 | 72 (59%)                       | 19 (83%)                             | 30 (61%)                                | 179 (44%)                      |
| IV tPA                  | 132 (36%)                             | 11 (32%)                                | 25 (27%)                      | 10 (38%)                             | 63 (40%)                                 | 39 (31%)                       | 7 (30%)                              | 15 (31%)                                | 149 (37%)                      |
| General Anesthesia      | 151 (41%)                             | 6 (19%)                                 | 13 (14%)                      | 16 (62%)                             | 92 (58%)                                 | 57 (46%)                       | 4 (17%)                              | 8 (17%)                                 | 195 (48%)                      |
| eTICI 2c/3              | 129 (35%)                             | 9 (26%)                                 | 34 (37%)                      | 10 (38%)                             | 45 (28%)                                 | 51 (40%)                       | 11 (48%)                             | 9 (18%)                                 | 115 (28%)                      |

<sup>1</sup>Median (IQR); n (%)

Table S3. Descriptive analysis of second pass patients according to first and second pass techniques for the eTICI2b-3 cohort.

| First Pass                | Stent Retriever                             |                                               |                                  | Contact Aspiration                         |                                                |                                   | Combined                                   |                                               |                                   |
|---------------------------|---------------------------------------------|-----------------------------------------------|----------------------------------|--------------------------------------------|------------------------------------------------|-----------------------------------|--------------------------------------------|-----------------------------------------------|-----------------------------------|
| Second Pass<br>→          | Stent<br>Retriever,<br>N = 259 <sup>1</sup> | Contact<br>Aspiration,<br>N = 23 <sup>1</sup> | Combined,<br>N = 84 <sup>1</sup> | Stent<br>Retriever,<br>N = 15 <sup>1</sup> | Contact<br>Aspiration, N<br>= 125 <sup>1</sup> | Combined,<br>N = 101 <sup>1</sup> | Stent<br>Retriever,<br>N = 17 <sup>1</sup> | Contact<br>Aspiration,<br>N = 41 <sup>1</sup> | Combined,<br>N = 339 <sup>1</sup> |
| Age                       | 68 [58 - 77]                                | 75 [62 - 81]                                  | 66 [57 - 80]                     | 60 [55 - 65]                               | 61 [49 - 73]                                   | 63 [54 - 72]                      | 65 [55 - 68]                               | 64 [60 - 74]                                  | 71 [62 - 81]                      |
| Male                      | 131 (51%)                                   | 10 (43%)                                      | 40 (48%)                         | 10 (67%)                                   | 75 (60%)                                       | 64 (63%)                          | 11 (65%)                                   | 19 (46%)                                      | 162 (48%)                         |
| Occlusion<br>location     |                                             |                                               |                                  |                                            |                                                |                                   |                                            |                                               |                                   |
| MCA M1                    | 139 (54%)                                   | 8 (35%)                                       | 40 (49%)                         | 8 (53%)                                    | 53 (42%)                                       | 53 (52%)                          | 10 (59%)                                   | 19 (46%)                                      | 162 (48%)                         |
| MCA M2                    | 69 (27%)                                    | 9 (39%)                                       | 27 (33%)                         | 2 (13%)                                    | 29 (23%)                                       | 22 (22%)                          | 5 (29%)                                    | 16 (39%)                                      | 114 (34%)                         |
| Intracranial<br>ICA       | 41 (16%)                                    | 6 (26%)                                       | 14 (17%)                         | 3 (20%)                                    | 29 (23%)                                       | 14 (14%)                          | 2 (12%)                                    | 4 (9.8%)                                      | 48 (14%)                          |
| Basilar                   | 9 (3.5%)                                    | 0 (0%)                                        | 0 (0%)                           | 2 (13%)                                    | 14 (11%)                                       | 12 (12%)                          | 0 (0%)                                     | 2 (4.9%)                                      | 15 (4.4%)                         |
| ASPECTS                   | 8 [7 - 10]                                  | 8 [7 - 10]                                    | 8 [7 - 10]                       | 9 [7 - 10]                                 | 9 [7 - 10]                                     | 8 [7 - 9]                         | 8 [6 - 9]                                  | 8 [7 - 9]                                     | 8 [7 - 10]                        |
| NIHSS                     | 17 [13 - 22]                                | 18 [14 - 23]                                  | 16 [11 - 23]                     | 22 [19 - 25]                               | 17 [12 - 22]                                   | 18 [11 - 23]                      | 16 [14 - 18]                               | 18 [15 - 21]                                  | 17 [11 - 21]                      |
| LKW-<br>Puncture time     | 395 [240 -<br>775]                          | 529 [203 -<br>1080]                           | 413 [223 -<br>730]               | 409 [343 -<br>518]                         | 379 [214 -<br>788]                             | 441 [222 -<br>795]                | 693 [329 -<br>1019]                        | 356 [187 -<br>650]                            | 364 [230 -<br>728]                |
| Procedural<br>time (min)  | 74 [50 -<br>108]                            | 78 [50 - 126]                                 | 69 [52 - 99]                     | 56 [37 - 76]                               | 55 [42 - 75]                                   | 58 [40 - 84]                      | 73 [55 -<br>117]                           | 88 [74 - 113]                                 | 70 [49 -<br>106]                  |
| Balloon guide<br>catheter | 192 (82%)                                   | 20 (95%)                                      | 76 (90%)                         | 6 (67%)                                    | 49 (49%)                                       | 57 (58%)                          | 15 (88%)                                   | 24 (59%)                                      | 132 (39%)                         |
| IV tPA                    | 90 (35%)                                    | 6 (26%)                                       | 24 (29%)                         | 4 (27%)                                    | 47 (38%)                                       | 31 (31%)                          | 5 (29%)                                    | 11 (27%)                                      | 125 (37%)                         |
| General<br>Anesthesia     | 93 (36%)                                    | 4 (18%)                                       | 12 (14%)                         | 9 (60%)                                    | 68 (55%)                                       | 44 (44%)                          | 2 (12%)                                    | 5 (13%)                                       | 164 (49%)                         |
| eTICI 2b+                 | 137 (53%)                                   | 7 (30%)                                       | 43 (51%)                         | 11 (73%)                                   | 50 (40%)                                       | 60 (59%)                          | 11 (65%)                                   | 16 (39%)                                      | 167 (49%)                         |

<sup>1</sup>Median [IQR]; n (%)

Table S4. Sequences and reperfusion rates in the third pass according to techniques (2c-3 cohort)

| Two first passes        | Stent Retriever, Stent Retriever |                                             |                                               | Contact Aspiration, Contact Aspiration |                                            |                                               | Combined, Combined                |                                           |                                               |
|-------------------------|----------------------------------|---------------------------------------------|-----------------------------------------------|----------------------------------------|--------------------------------------------|-----------------------------------------------|-----------------------------------|-------------------------------------------|-----------------------------------------------|
| Third pass              | Combined,<br>N = 25 <sup>1</sup> | Stent<br>Retriever,<br>N = 122 <sup>1</sup> | Contact<br>Aspiration,<br>N = 19 <sup>1</sup> | Combined,<br>N = 42 <sup>1</sup>       | Stent<br>Retriever,<br>N = 12 <sup>1</sup> | Contact<br>Aspiration,<br>N = 35 <sup>1</sup> | Combined,<br>N = 168 <sup>1</sup> | Stent<br>Retriever,<br>N = 8 <sup>1</sup> | Contact<br>Aspiration,<br>N = 32 <sup>1</sup> |
| Age                     | 72 [61 - 80]                     | 68 [57 - 77]                                | 70 [58 - 78]                                  | 57 [46 - 72]                           | 59 [49 - 64]                               | 61 [50 - 77]                                  | 72 [62 - 81]                      | 76 [71 - 78]                              | 75 [61 - 83]                                  |
| Male                    | 13 (52%)                         | 57 (47%)                                    | 8 (42%)                                       | 28 (67%)                               | 9 (75%)                                    | 18 (51%)                                      | 88 (53%)                          | 3 (38%)                                   | 14 (44%)                                      |
| Occlusion location      |                                  |                                             |                                               |                                        |                                            |                                               |                                   |                                           |                                               |
| MCA M1                  | 16 (64%)                         | 69 (57%)                                    | 9 (47%)                                       | 15 (36%)                               | 8 (67%)                                    | 11 (31%)                                      | 73 (43%)                          | 2 (25%)                                   | 18 (56%)                                      |
| MCA M2                  | 1 (4.0%)                         | 31 (25%)                                    | 7 (37%)                                       | 9 (21%)                                | 4 (33%)                                    | 12 (34%)                                      | 63 (38%)                          | 5 (63%)                                   | 9 (28%)                                       |
| Intracranial ICA        | 7 (28%)                          | 14 (11%)                                    | 2 (11%)                                       | 10 (24%)                               | 0 (0%)                                     | 9 (26%)                                       | 24 (14%)                          | 1 (13%)                                   | 5 (16%)                                       |
| Basilar                 | 1 (4.0%)                         | 8 (6.6%)                                    | 1 (5.3%)                                      | 8 (19%)                                | 0 (0%)                                     | 3 (8.6%)                                      | 8 (4.8%)                          | 0 (0%)                                    | 0 (0%)                                        |
| ASPECTS                 | 8 [7 - 9]                        | 8 [7 - 10]                                  | 9 [8 - 10]                                    | 8 [7 - 9]                              | 8 [8 - 9]                                  | 8 [6 - 9]                                     | 8 [7 - 10]                        | 8 [8 - 8]                                 | 8 [7 - 10]                                    |
| NIHSS                   | 19 [14 - 22]                     | 17 [13 - 21]                                | 18 [13 - 21]                                  | 18 [13 - 22]                           | 11 [9 - 17]                                | 19 [16 - 26]                                  | 17 [11 - 21]                      | 19 [14 - 21]                              | 19 [14 - 23]                                  |
| LKW-Puncture time (min) | 681 [353 - 902]                  | 307 [148 - 586]                             | 462 [258 - 646]                               | 385 [212 - 742]                        | 257 [182 - 744]                            | 300 [169 - 564]                               | 322 [213 - 644]                   | 627 [237 - 1062]                          | 402 [225 - 854]                               |
| Procedural time (min)   | 83 [66 - 126]                    | 107 [78 - 141]                              | 92 [72 - 127]                                 | 62 [49 - 87]                           | 69 [60 - 93]                               | 54 [45 - 69]                                  | 83 [58 - 130]                     | 63 [55 - 102]                             | 89 [71 - 122]                                 |
| Balloon guide catheter  | 22 (88%)                         | 65 (63%)                                    | 16 (84%)                                      | 20 (49%)                               | 3 (43%)                                    | 15 (52%)                                      | 53 (32%)                          | 7 (88%)                                   | 23 (72%)                                      |
| IV tPA                  | 3 (12%)                          | 49 (40%)                                    | 5 (26%)                                       | 14 (33%)                               | 4 (33%)                                    | 16 (46%)                                      | 78 (47%)                          | 2 (25%)                                   | 8 (25%)                                       |
| General Anesthesia      | 5 (20%)                          | 66 (55%)                                    | 3 (16%)                                       | 22 (55%)                               | 10 (83%)                                   | 18 (51%)                                      | 104 (62%)                         | 1 (13%)                                   | 10 (31%)                                      |
| eTICI 2c/3              | 11 (44%)                         | 25 (20%)                                    | 3 (16%)                                       | 19 (45%)                               | 4 (33%)                                    | 11 (31%)                                      | 50 (30%)                          | 3 (38%)                                   | 6 (19%)                                       |

<sup>1</sup>Median [IQR]; n (%)

Table S5. (Sequences and reperfusion rates in the third pass according to techniques **(2b+ cohort)**)

| Two first passes         | Stent Retriever, Stent Retriever |                                      |                                         | Contact Aspiration, Contact Aspiration |                                      |                                         | Combined, Combined             |                                     |                                         |
|--------------------------|----------------------------------|--------------------------------------|-----------------------------------------|----------------------------------------|--------------------------------------|-----------------------------------------|--------------------------------|-------------------------------------|-----------------------------------------|
| Third pass               | Combined, N = 18 <sup>1</sup>    | Stent Retriever, N = 75 <sup>1</sup> | Contact Aspiration, N = 13 <sup>1</sup> | Combined, N = 33 <sup>1</sup>          | Stent Retriever, N = 11 <sup>1</sup> | Contact Aspiration, N = 25 <sup>1</sup> | Combined, N = 139 <sup>1</sup> | Stent Retriever, N = 5 <sup>1</sup> | Contact Aspiration, N = 22 <sup>1</sup> |
| Age                      | 71 [60 - 80]                     | 68 [57 - 75]                         | 70 [56 - 74]                            | 55 [47 - 73]                           | 54 [49 - 60]                         | 61 [48 - 74]                            | 74 [64 - 82]                   | 76 [73 - 84]                        | 77 [61 - 84]                            |
| Male                     | 11 (61%)                         | 36 (48%)                             | 5 (38%)                                 | 24 (73%)                               | 8 (73%)                              | 14 (56%)                                | 70 (51%)                       | 1 (20%)                             | 11 (50%)                                |
| Occlusion location       |                                  |                                      |                                         |                                        |                                      |                                         |                                |                                     |                                         |
| M1                       | 9 (50%)                          | 45 (60%)                             | 6 (46%)                                 | 13 (39%)                               | 8 (73%)                              | 8 (32%)                                 | 76 (55%)                       | 1 (20%)                             | 13 (59%)                                |
| ICA T                    | 7 (39%)                          | 13 (17%)                             | 1 (7.7%)                                | 7 (21%)                                | 1 (9.1%)                             | 9 (36%)                                 | 31 (22%)                       | 1 (20%)                             | 5 (23%)                                 |
| M2                       | 2 (11%)                          | 11 (15%)                             | 6 (46%)                                 | 5 (15%)                                | 2 (18%)                              | 5 (20%)                                 | 22 (16%)                       | 2 (40%)                             | 4 (18%)                                 |
| Basilar                  | 0 (0%)                           | 4 (5.3%)                             | 0 (0%)                                  | 7 (21%)                                | 0 (0%)                               | 2 (8.0%)                                | 9 (6.5%)                       | 0 (0%)                              | 0 (0%)                                  |
| ICA Petrous or Cavernous | 0 (0%)                           | 2 (2.7%)                             | 0 (0%)                                  | 1 (3.0%)                               | 0 (0%)                               | 1 (4.0%)                                | 1 (0.7%)                       | 1 (20%)                             | 0 (0%)                                  |
| ASPECTS                  | 8 [7 - 9]                        | 8 [6 - 10]                           | 10 [7 - 10]                             | 8 [7 - 9]                              | 8 [8 - 10]                           | 9 [6 - 10]                              | 8 [7 - 10]                     | 8 [8 - 8]                           | 7 [7 - 10]                              |
| NIHSS                    | 19 [14 - 22]                     | 17 [13 - 22]                         | 17 [10 - 20]                            | 18 [12 - 22]                           | 11 [9 - 18]                          | 18 [15 - 21]                            | 16 [11 - 21]                   | 19 [18 - 21]                        | 19 [14 - 21]                            |
| LKW-Puncture time (min)  | 646 [366 - 879]                  | 380 [210 - 710]                      | 542 [389 - 734]                         | 559 [272 - 814]                        | 268 [216 - 816]                      | 456 [169 - 612]                         | 326 [218 - 667]                | 827 [426 - 947]                     | 492 [287 - 874]                         |
| Procedural time (min)    | 83 [59 - 134]                    | 112 [94 - 144]                       | 108 [91 - 127]                          | 61 [47 - 85]                           | 67 [58 - 93]                         | 60 [45 – 78]                            | 84 [60 – 124]                  | 55 [55 – 90]                        | 88 [68 – 129]                           |
| Balloon guide catheter   | 15 (83%)                         | 42 (69%)                             | 12 (92%)                                | 16 (50%)                               | 4 (57%)                              | 10 (50%)                                | 34 (24%)                       | 5 (100%)                            | 15 (68%)                                |
| IV tPA                   | 4 (22%)                          | 28 (37%)                             | 4 (31%)                                 | 10 (30%)                               | 3 (27%)                              | 10 (40%)                                | 69 (50%)                       | 1 (20%)                             | 6 (27%)                                 |
| General Anesthesia       | 2 (11%)                          | 34 (46%)                             | 1 (7.7%)                                | 17 (55%)                               | 8 (73%)                              | 11 (44%)                                | 91 (66%)                       | 0 (0%)                              | 7 (32%)                                 |
| eTICI 2b-3               | 10 (56%)                         | 32 (43%)                             | 5 (38%)                                 | 23 (70%)                               | 8 (73%)                              | 12 (48%)                                | 66 (47%)                       | 4 (80%)                             | 10 (45%)                                |

<sup>1</sup>Median [IQR]; n (%)

Table S6. First pass strategies according to site

|                     | Overall, N = 2968 <sup>1</sup> | Site 1, N = 1989 <sup>1</sup><br>2015-2023 | Site 2, N = 468 <sup>1</sup><br>2018-2023 | Site 3, N = 511 <sup>1</sup><br>2019-2023 | p-value <sup>2</sup> |
|---------------------|--------------------------------|--------------------------------------------|-------------------------------------------|-------------------------------------------|----------------------|
| First pass strategy |                                |                                            |                                           |                                           | <0.001               |
| Stent Retriever     | 1222 (41.2%)                   | 929 (46.7%)                                | 6 (1.3%)                                  | 287 (56.2%)                               |                      |
| Contact Aspiration  | 664 (22.4%)                    | 392 (19.7%)                                | 96 (20.5%)                                | 176 (34.4%)                               |                      |
| Combined            | 1082 (36.5%)                   | 668 (33.6%)                                | 366 (78.2%)                               | 48 (9.4%)                                 |                      |

<sup>1</sup>n (%)

<sup>2</sup>Pearson's Chi-squared test



Table S7. Aspiration catheter inner diameters for first second pass techniques

|                     | Contact Aspiration <sup>1</sup> | Combined <sup>1</sup> | p-value <sup>2</sup> |
|---------------------|---------------------------------|-----------------------|----------------------|
| First pass          | N = 668                         | N = 1083              |                      |
| Inner diameter (mm) | 0.070 (0.068 – 0.071)           | 0.070 (0.068 – 0.071) | < 0.001              |
| Second pass         | N = 246                         | N = 632               |                      |
| Inner diameter (mm) | 0.070 (0.060 – 0.071)           | 0.070 (0.068 – 0.071) | 0.588                |

<sup>1</sup>Median (IQR)

<sup>2</sup>Wilcoxon rank sum test

Table S8. Binary logistic regression model for mRS 0-2 according to first and second pass techniques

|                             | Stent-Retriever          |         | Contact Aspiration       |         | Combined Technique       |         |
|-----------------------------|--------------------------|---------|--------------------------|---------|--------------------------|---------|
| Characteristic <sup>1</sup> | OR (95% CI) <sup>2</sup> | p-value | OR (95% CI) <sup>2</sup> | p-value | OR (95% CI) <sup>2</sup> | p-value |
| Second pass strategy        |                          |         |                          |         |                          |         |
| Stent Retriever             | —                        |         | 0.9 (0.1, 4.2)           | 0.912   | 1.3 (0.3, 4.4)           | 0.690   |
| Aspiration Catheter         | 0.6 (0.2, 1.7)           | 0.367   | —                        |         | 0.6 (0.2, 1.6)           | 0.353   |
| Combined                    | 0.9 (0.5, 1.8)           | 0.849   | 1.5 (0.7, 3.3)           | 0.315   | —                        |         |

<sup>1</sup>Models adjusted for age, occlusion location, previous pass eTICI and center.

<sup>2</sup>OR = Odds Ratio, CI = Confidence Interval

Table S9. Modified Rankin Scale at day 90 according to change in technique following one failed pass

| 2c-3 Cohort |                          |                         |                         |         |                      |                         |                          |                          |         |                      |                         |                         |                          |         |                      |
|-------------|--------------------------|-------------------------|-------------------------|---------|----------------------|-------------------------|--------------------------|--------------------------|---------|----------------------|-------------------------|-------------------------|--------------------------|---------|----------------------|
| First Pass  | Stent Retriever          |                         |                         |         |                      | Contact Aspiration      |                          |                          |         |                      | Combined                |                         |                          |         |                      |
| Second Pass | SR, N = 370 <sup>1</sup> | CA, N = 34 <sup>1</sup> | CT, N = 92 <sup>1</sup> | Missing | p-value <sup>2</sup> | SR, N = 26 <sup>1</sup> | CA, N = 160 <sup>1</sup> | CT, N = 126 <sup>1</sup> | Missing | p-value <sup>2</sup> | SR, N = 23 <sup>1</sup> | CA, N = 49 <sup>1</sup> | CT, N = 409 <sup>1</sup> | Missing | p-value <sup>3</sup> |
| mRS         | 4 (2 – 7)                | 5 (3 – 7)               | 5 (2 – 6)               | 109     | 0.504                | 5 (3 – 6)               | 4 (3 – 7)                | 4 (2 – 7)                | 90      | 0.927                | 4 (2 – 5)               | 5 (4 – 7)               | 5 (3 – 7)                | 83      | 0.237                |
| mRS (LOCF)  | 4 (1 – 5)                | 4 (2 – 6)               | 4 (1 – 5)               | 23      | 0.694                | 4 (2 – 5)               | 3 (2 – 5)                | 3 (2 – 5)                | 25      | 0.945                | 3 (1 – 4)               | 4 (2 – 6)               | 4 (2 – 6)                | 8       | 0.261                |
| mRS missing | 76 (21%)                 | 11 (32%)                | 22 (24%)                | 0       | 0.249                | 8 (31%)                 | 47 (29%)                 | 35 (28%)                 | 0       | 0.933                | 4 (17%)                 | 8 (16%)                 | 71 (17%)                 | 0       | >0.999               |
| 2b-3 Cohort |                          |                         |                         |         |                      |                         |                          |                          |         |                      |                         |                         |                          |         |                      |
| First pass  | Stent Retriever          |                         |                         |         |                      | Contact Aspiration      |                          |                          |         |                      | Combined                |                         |                          |         |                      |
| Second Pass | SR, N = 259 <sup>1</sup> | CA, N = 23 <sup>1</sup> | CT, N = 84 <sup>1</sup> | Missing | p-value <sup>2</sup> | SR, N = 15 <sup>1</sup> | CA, N = 125 <sup>1</sup> | CT, N = 101 <sup>1</sup> | Missing | p-value <sup>3</sup> | SR, N = 17 <sup>1</sup> | CA, N = 41 <sup>1</sup> | CT, N = 339 <sup>1</sup> | Missing | p-value <sup>3</sup> |
| mRS         | 5 (2 – 7)                | 6 (3 – 7)               | 4 (2 – 6)               | 83      | 0.384                | 4 (3 – 7)               | 4 (2 – 7)                | 5 (3 – 7)                | 71      | 0.733                | 4 (2 – 5)               | 5 (4 – 7)               | 5 (3 – 7)                | 70      | 0.239                |
| mRS (LOCF)  | 4 (2 – 5)                | 4 (3 – 6)               | 4 (1 – 5)               | 20      | 0.425                | 4 (2 – 6)               | 4 (2 – 5)                | 4 (2 – 5)                | 20      | 0.901                | 3 (1 – 4)               | 4 (3 – 6)               | 4 (2 – 6)                | 8       | 0.234                |
| mRS missing | 54 (21%)                 | 9 (39%)                 | 20 (24%)                | 0       | 0.128                | 5 (33%)                 | 37 (30%)                 | 29 (29%)                 | 0       | 0.923                | 3 (18%)                 | 7 (17%)                 | 60 (18%)                 | 0       | >0.999               |

<sup>1</sup>Median (IQR); n (%)

<sup>2</sup>Kruskal-Wallis rank sum test; Pearson's Chi-squared test

<sup>3</sup>Kruskal-Wallis rank sum test; Fisher's exact test

mRS: Modified Rankin Scale; LOCF: Last Observation Carried Forward

Table S10. Complications according to first and second pass strategies

| Stent Retriever            |                                            |                                              |                                 |                          | Contact Aspiration                        |                                               |                                  |                          | Combined                                  |                                              |                                  |                          |
|----------------------------|--------------------------------------------|----------------------------------------------|---------------------------------|--------------------------|-------------------------------------------|-----------------------------------------------|----------------------------------|--------------------------|-------------------------------------------|----------------------------------------------|----------------------------------|--------------------------|
| Second Pass<br>→           | Stent<br>Retriever<br>N = 370 <sup>1</sup> | Contact<br>Aspiration<br>N = 34 <sup>1</sup> | Combined<br>N = 92 <sup>1</sup> | p-<br>value <sup>2</sup> | Stent<br>Retriever<br>N = 26 <sup>1</sup> | Contact<br>Aspiration<br>N = 160 <sup>1</sup> | Combined<br>N = 126 <sup>1</sup> | p-<br>value <sup>2</sup> | Stent<br>Retriever<br>N = 23 <sup>1</sup> | Contact<br>Aspiration<br>N = 49 <sup>1</sup> | Combined<br>N = 409 <sup>1</sup> | p-<br>value <sup>2</sup> |
| Subarachnoid<br>hemorrhage | 55<br>(15.7%)                              | 3 (9.4%)                                     | 12 (13.2%)                      | 0.632                    | 1 (4.3%)                                  | 21 (14.1%)                                    | 21 (16.9%)                       | 0.318                    | 3 (13.0%)                                 | 6 (12.5%)                                    | 68 (16.7%)                       | 0.827                    |
| Parenchymal<br>hematoma    |                                            |                                              |                                 | 0.447                    |                                           |                                               |                                  | 0.791                    |                                           |                                              |                                  | >0.999                   |
| Absent                     | 339<br>(96.0%)                             | 32<br>(100.0%)                               | 87 (95.6%)                      |                          | 24<br>(100.0%)                            | 138<br>(92.6%)                                | 112<br>(90.3%)                   |                          | 22<br>(95.7%)                             | 44 (91.7%)                                   | 372<br>(91.4%)                   |                          |
| PH-1                       | 10 (2.8%)                                  | 0 (0.0%)                                     | 1 (1.1%)                        |                          | 0 (0.0%)                                  | 6 (4.0%)                                      | 7 (5.6%)                         |                          | 1 (4.3%)                                  | 3 (6.3%)                                     | 25 (6.1%)                        |                          |
| PH-2                       | 4 (1.1%)                                   | 0 (0.0%)                                     | 3 (3.3%)                        |                          | 0 (0.0%)                                  | 5 (3.4%)                                      | 5 (4.0%)                         |                          | 0 (0.0%)                                  | 1 (2.1%)                                     | 10 (2.5%)                        |                          |

<sup>1</sup>n (%)

<sup>2</sup>Pearson's Chi-squared test; Fisher's exact test
